# Supplementary material for: A systematic scoping review of approaches to teaching and assessing empathy in medicine
Source: PubMed Central journal article supplement (PMC8140468; doi:10.1186/s12909-021-02697-6), 2021-05-22
Supplement: 12909_2021_2697_MOESM1_ESM.pdf [file 12909_2021_2697_MOESM1_ESM.pdf]

Supplementary File 1. PubMed Search strategy

Supplementary File 1. PubMed Search strategy

| Database      | Search terms                                                                                                                                                                     |
|---------------|----------------------------------------------------------------------------------------------------------------------------------------------------------------------------------|
| <b>Pubmed</b> | ("Empathy"[Mesh]<br>OR empath*[TIAB]) AND ("Medicine"[Mesh] OR Medicine[TIAB] OR "medical<br>student"[TIAB] OR "medical students"[TIAB] OR doctor*[TIAB] OR<br>physician*[TIAB]) |
